# Supplementary material for: Evolution of Food Safety Features and Volatile Profile in White Sturgeon Caviar Treated with Different Formulations of Salt and Preservatives during a Long-Term Storage Time
Source: PubMed Central journal article supplement (PMC8070692; doi:10.3390/foods10040850), 2021-04-14
Supplement: foods-10-00850-s001.pdf [file foods-10-00850-s001.pdf]

Table 2. - extended with replicates and additional data.

| t0= unripened roe                |  |      |      |      |      |       |          |       |       |       |          |       |          |       |          |       |       |       |          |
|----------------------------------|--|------|------|------|------|-------|----------|-------|-------|-------|----------|-------|----------|-------|----------|-------|-------|-------|----------|
|                                  |  | NC   |      |      |      |       | OAM      |       |       |       |          | BSM   |          |       |          |       |       |       |          |
| Sample no                        |  | 1    | 2    | 3    | 4    | mean  | countabl | 1     | 2     | 3     | 4        | mean  | countabl | 1     | 2        | 3     | 4     | mean  | Countabl |
| pH                               |  | 5.84 | 5.88 | 5.84 | 5.88 | 5.86  |          | 6.13  | 6.23  | 6.3   | 5.83     | 6.12  |          | 6.17  | 6.12     | 6.16  | 6.14  | 6.12  |          |
| aw                               |  | 0.97 | 0.97 | 0.97 | 0.98 | 0.977 |          | 0.97  | 0.97  | 0.96  | 0.98     | 0.975 |          | 0.97  | 0.97     | 0.97  | 0.97  | 0.975 |          |
| TVC                              |  | <1   | 1    | 1.48 | <1   | 1.24  | 2/4      | 1     | 1     | 1.30  | 1        | 1.08  | 4/4      | 1     | 1.30     | 1.78  | 1.85  | 1.48  | 4/4      |
| Halophiles                       |  | <1   | <1   | <1   | 1    | 1     | 1/4      | 1.30  | <1    | 1.30  | <1       | 1.30  | 2/4      | <1    | <1       | <1    | <1    | <1    | 4/4      |
| Bacilli                          |  | 1.30 | 1.30 | 1    | <1   | 1.20  | 3/4      | <1    | 1     | <1    | <1       | 1     | 1/4      | 1     | <1       | <1    | 1.6   | 1.30  | 2/4      |
| Moulds                           |  | <1   | <1   | <1   | <1   | <1    | 4/4      | <1    | <1    | 1     | <1       | 1     | 1/4      | <1    | <1       | <1    | <1    | <1    | 4/4      |
| t1= 4 months of caviar ripening  |  |      |      |      |      |       |          |       |       |       |          |       |          |       |          |       |       |       |          |
|                                  |  | NC   |      |      |      |       | OAM      |       |       |       |          | BSM   |          |       |          |       |       |       |          |
| Sample no                        |  | 1    | 2    | 3    | 4    | mean  | countabl | 1     | 2     | 3     | 4        | mean  | countabl | 1     | 2        | 3     | 4     | mean  | Countabl |
| pH                               |  | 5.96 | 5.96 | 6.01 | 5.95 | 5.97  |          | 6.33  | 6.35  | 6.42  | 6.03     | 6.28  |          | 6.44  | 6.41     | 6.37  | 6.46  | 6.42  |          |
| aw                               |  | 0.96 | 0.96 | 0.96 | 0.96 | 0.964 |          | 0.96  | 0.97  | 0.95  | 0.96     | 0.961 |          | 0.97  | 0.96     | 0.96  | 0.96  | 0.966 |          |
| TVC                              |  | 5.81 | 6.02 | 5.21 | 6.51 | 5.89  | 4/4      | 1.60  | 1.00  | <1    | 1.00     | 1.20  | 3/4      | 1.30  | 1.30     | <1    | 1.90  | 1.50  | 3/4      |
| Halophiles                       |  | 4.48 | 4.30 | 4.48 | 4.60 | 4.46  | 4/4      | 1.00  | <1    | <1    | <1       | 1     | 1/4      | 1     | 1        | 1.30  | 1.30  | 1.15  | 4/4      |
| Bacilli                          |  | 6.48 | 6.30 | 5.47 | 6.30 | 6.14  | 4/4      | 3.30  | 1.30  | 1.48  | 1.00     | 1.77  | 4/4      | <1    | <1       | <1    | 2.08  | 2.08  | 1/4      |
| Moulds                           |  | <1   | <1   | <1   | <1   | <1    | 4/4      | <1    | <1    | <1    | <1       | <1    | 4/4      | <1    | <1       | <1    | <1    | <1    | 4/4      |
| t2= 8 months of caviar ripening  |  |      |      |      |      |       |          |       |       |       |          |       |          |       |          |       |       |       |          |
|                                  |  | NC   |      |      |      |       | OAM      |       |       |       |          | BSM   |          |       |          |       |       |       |          |
| Sample no                        |  | 1    | 2    | 3    | 4    | mean  | countabl | 1     | 3     | mean  | countabl | 1     | 4        | mean  | countabl |       |       |       |          |
| pH                               |  | 5.9  | 5.94 | 5.93 | 5.83 | 5.90  |          | 6.24  | 6.27  | 6.26  |          | 6.34  |          | 6.27  | 6.31     |       |       |       |          |
| aw                               |  | 0.95 | 0.96 | 0.96 | 0.96 | 0.961 |          | 0.962 | 0.963 | 0.963 |          | 0.97  |          | 0.966 | 0.968    |       |       |       |          |
| TVC                              |  | 2    | 6.94 | 6.65 | 6.78 | 4.59  | 4/4      | <1    | <1    | <1    | 2/2      | <1    |          | <1    | <1       | 2/2   |       |       |          |
| Halophiles                       |  | <1   | 6.72 | <1   | <1   | 6.72  | 1/4      | <1    | <1    | <1    | 2/2      | 3.34  |          | <1    | 3.34     | 1/2   |       |       |          |
| Bacilli                          |  | 2.30 | <1   | 6.64 | 6.95 | 5.30  | 3/4      | <1    | <1    | <1    | 2/2      | <1    |          | <1    | <1       | 2/2   |       |       |          |
| Moulds                           |  | <1   | 1.60 | <1   | <1   | 1.60  | 1/4      | <1    | <1    | <1    | 2/2      | <1    |          | <1    | <1       | 2/2   |       |       |          |
| t3= 14 months of caviar ripening |  |      |      |      |      |       |          |       |       |       |          |       |          |       |          |       |       |       |          |
|                                  |  | NC   |      |      |      |       | OAM      |       |       |       |          | BSM   |          |       |          |       |       |       |          |
| Sample no                        |  | 1    | 2    | 3    | 4    | mean  | countabl | 1     | 2     | 3     | 4        | mean  | countabl | 1     | 2        | 3     | 4     | mean  | countabl |
| pH                               |  | 5.87 | 5.85 | 5.87 | 5.78 | 5.84  |          | 6.16  | 6.23  | 6.25  | 5.85     | 6.12  |          | 6.38  | 6.31     | 6.2   | 6.3   | 6.30  |          |
| aw                               |  | 0.96 | 0.95 | 0.95 | 0.95 | 0.957 |          | 0.957 | 0.956 | 0.954 | 0.955    |       | 0.966    | 0.959 | 0.963    | 0.958 | 0.962 |       |          |
| TVC                              |  | <1   | 7    | 6.68 | 7    | 6.89  | 3/4      | <1    | <1    | <1    | <1       | <1    | 4/4      | <1    | <1       | 1.3   | <1    | 1.3   | 1/4      |
| Halophiles                       |  | 1.7  | 7    | 6.83 | 6.3  | 5.46  | 4/4      | <1    | 1     | <1    | <1       | 1     | 1/4      | 1     | 1        | 1     | 1.3   | 1.08  | 4/4      |
| Bacilli                          |  | <1   | <1   | <1   | <1   | <1    | 4/4      | <1    | <1    | 1.48  | 1.7      | 1.59  | 2/4      | 1.3   | <1       | <1    | <1    | 1.3   | 1/4      |
| Moulds                           |  | 1.3  | <1   | <1   | 1.48 | 1.39  | 2/4      | <1    | 1     | 1     | 2.18     | 1.39  | 3/4      | 1.78  | 1.6      | 2.45  | 1     | 1.71  | 4/4      |

**Materials and methods of data not presented in the manuscript.**

Moulds were counted on Sabouraud Agar (ISO 21527-1:2008, [1]).  
presumptive *Bacillus cereus* was enumerated onto PEMBA (ISO 7932:2004 [2]).  
halophilic bacteria were enumerated onto Tryptic Soy Agar supplemented with NaCl  
(30 g/L) then incubated at 30°C for 48h.  
All the media were supplied by Scharlab (Barcelona, E).

**Reference**

1. International Organization for Standardization (ISO) Microbiology of Food and Animal Feeding Stuffs—Horizontal Methods for the Enumeration of Yeasts and Moulds—Part 1: Colony Count Technique in Products with Water Activity Greater than 0, 95; ISO 21527-1:2008 2008.
2. International Organization for Standardization (ISO) Microbiology of food and animal feeding stuffs — Horizontal method for the enumeration of presumptive *Bacillus cereus* — Colony-count technique at 30 degrees C. ISO 7932:2004 2004.
